# Supplementary material
Source: Springer Nature journal article supplement (https://www.springermedizin.de/resource/supplementary/12883_2009_284_MOESM2_ESM.pdf/9455122)
Supplement: MOESM2 [file 9455122]

**Visit to emergency room or acutely admitted to a targeted site for a first stroke**

***Is the stroke a « mild » one?***

Yes if:

Canadian Neurological Scale >8.5 (if available) OR  
Modified Rankin Scale 0 to 2 OR  
Discharged home within three weeks of stroke

***Do they fulfill additional eligibility criteria?***

Have a telephone access AND  
Understand basic instructions AND Express basic needs AND  
Able to communicate in English or French AND  
Absence of moderate or severe cognitive deficits based on clinical judgment
